# Supplementary material for: Exploiting oxidative coupling of methane performed over La2(Ce1−xMgx)2O7−δ catalysts with disordered defective cubic fluorite structure
Source: Royal Society of Chemistry journal article supplement (doi:10.1039/d1cy00187f), 2021-01-01
Supplement: d1cy00187f1.pdf [file d1cy00187f1.pdf]

## Supplementary Material

### Exploiting oxidative coupling of methane performed over $\text{La}_2(\text{Ce}_{1-x}\text{Mg}_x)_2\text{O}_{7-\delta}$ catalysts with disordered defective cubic fluorite structure

Davi D. Petrolini<sup>a</sup>, Francielle F. C. Marcos<sup>b</sup>, Alessandra F. Lucrédio<sup>a</sup>, Valmor R. Mastelaro<sup>c</sup>, José M. Assaf<sup>d</sup>, and Elisabete M. Assaf<sup>a\*</sup>

<sup>a</sup>University of São Paulo, São Carlos Institute of Chemistry, Av. Trabalhador São-Carlense, 400, São Carlos, SP, 13560-970, Brazil.

<sup>b</sup>University of São Paulo, Escola Politécnica of the University of São Paulo, Av. Prof. Luciano Gualberto, t. 3, 380, São Paulo, SP, 05508-010, Brazil

<sup>c</sup>University of São Paulo, São Carlos Institute of Physics, Av. Trabalhador São-Carlense, 400, São Carlos, SP, 13560-970, Brazil.

<sup>d</sup>Federal University of São Carlos, Rod. W. Luiz, km 235, São Carlos, SP, 13565-905, Brazil.

$$X_{\text{CH}_4} = \frac{\text{moles of methane reacted}}{\text{moles of methane in the feed}} \times 100 \text{ (Eq. 1)}$$

$$S_{\text{C}_2} = \frac{2(\text{moles of ethane and ethylene formed})}{\text{moles of methane reacted}} \times 100 \text{ (Eq. 2)}$$

$$Y_{\text{C}_2} = X_{\text{CH}_4} \times S_{\text{C}_2} \div 100 \text{ (Eq. 3)}$$

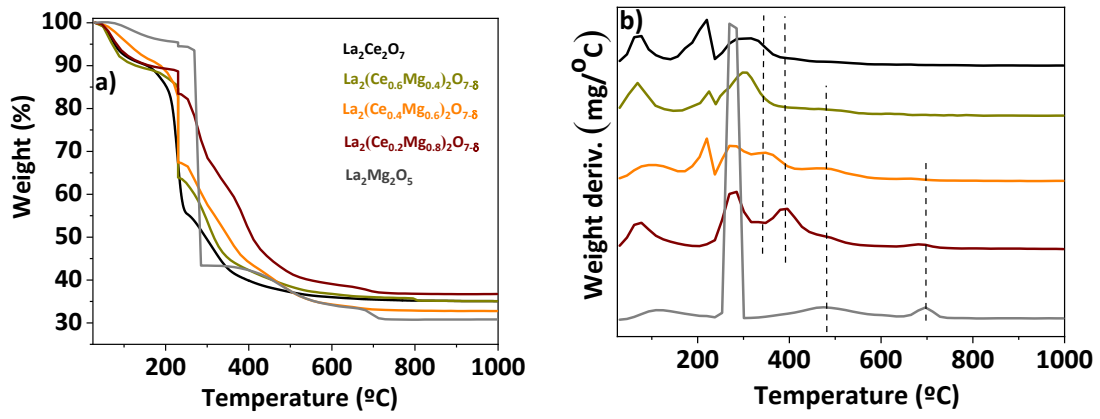

**Figure 1S.** a) Thermogravimetric and b) weight derivative curves of the as-synthesized  $\text{La}_2(\text{Ce}_{1-x}\text{Mg}_x)_2\text{O}_{7-\delta}$  catalysts.

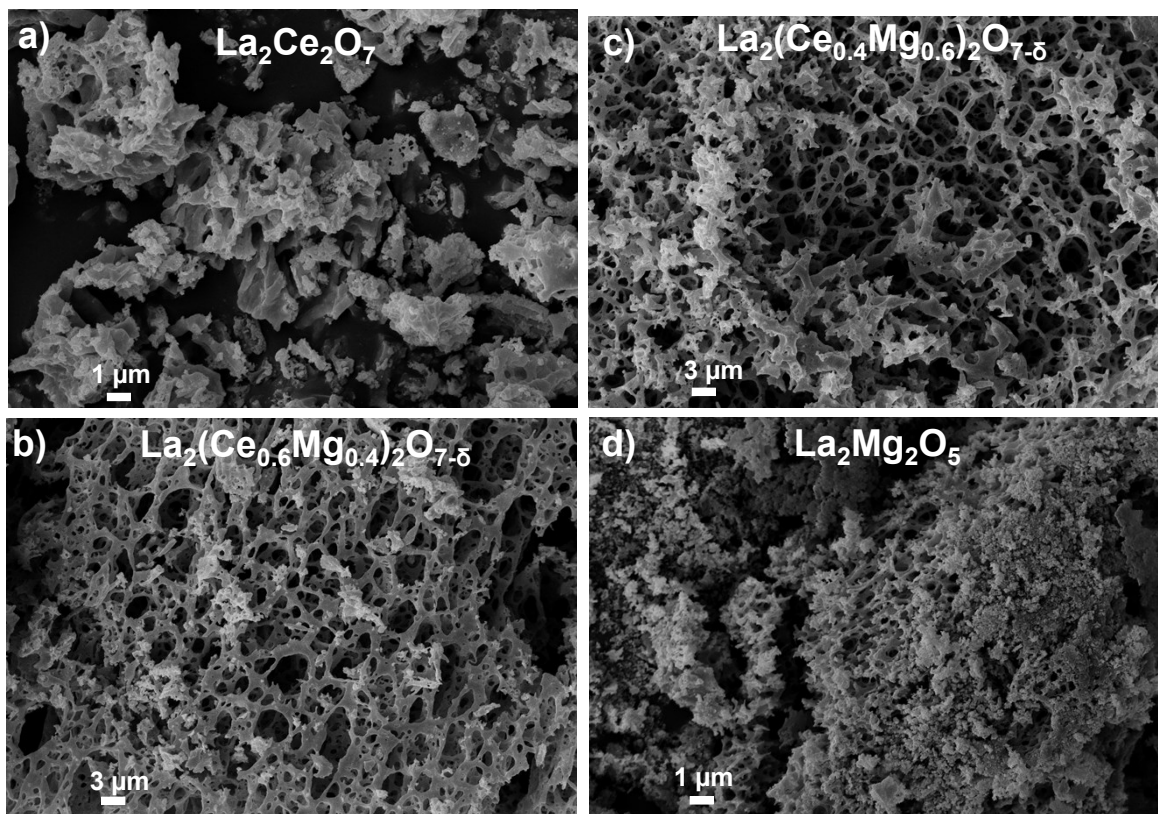

**Figure 2S.** Scanning electron microscopy images of the  $\text{La}_2(\text{Ce}_{1-x}\text{Mg}_x)_2\text{O}_{7-\delta}$  catalysts.

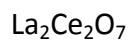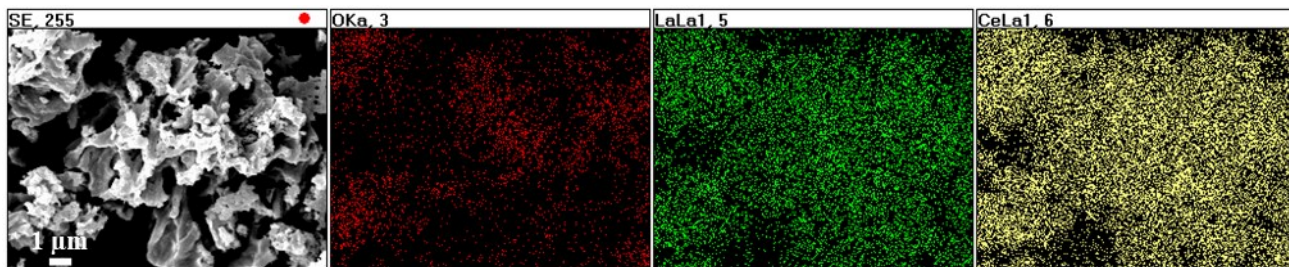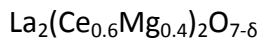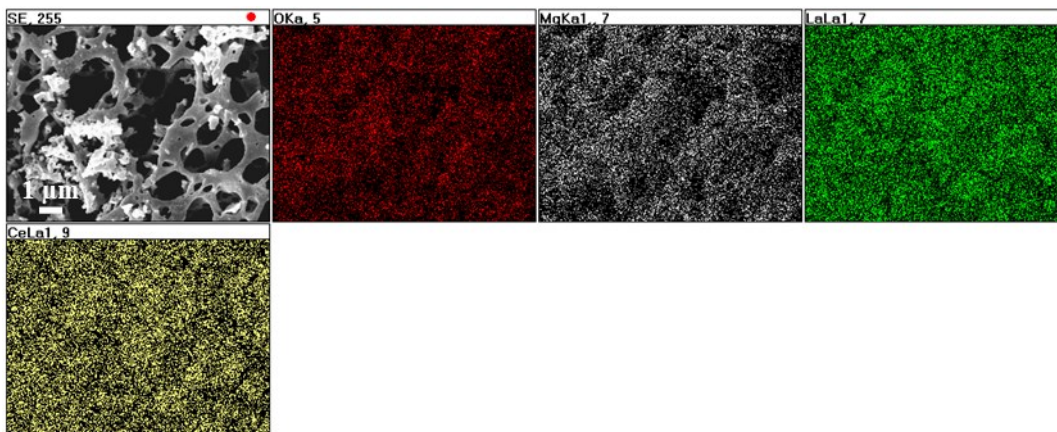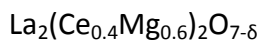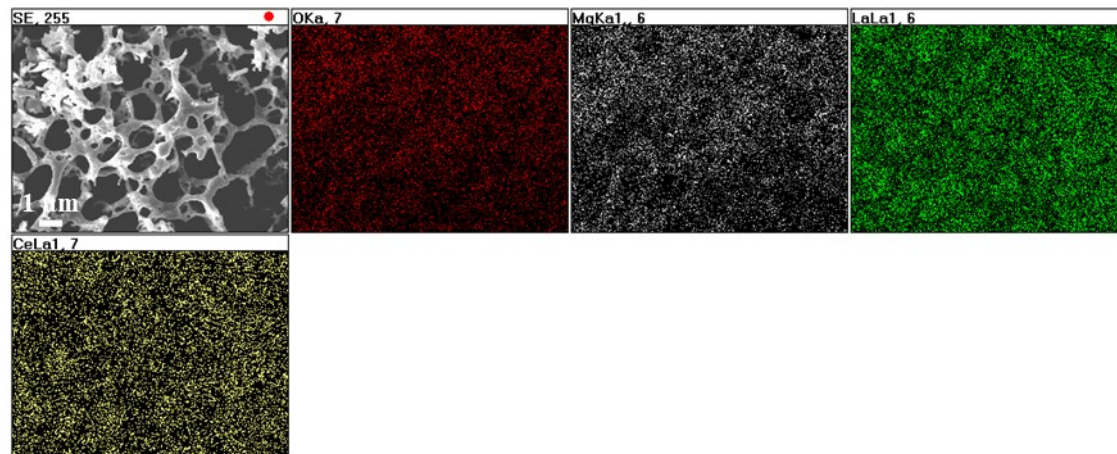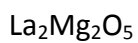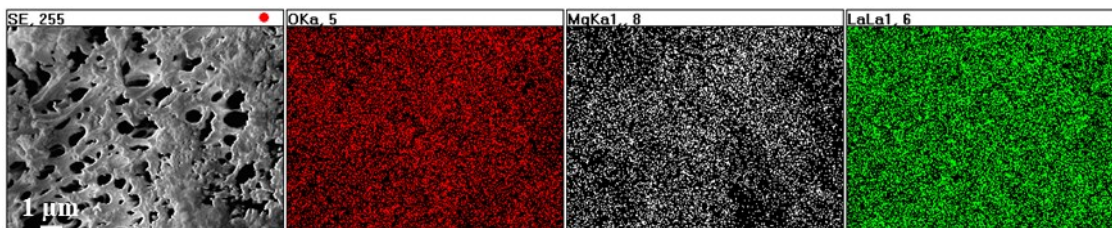

Figure 3S. SEM mapping images of the  $\text{La}_2(\text{Ce}_{1-x}\text{Mg}_x)_2\text{O}_{7-\delta}$  catalysts.

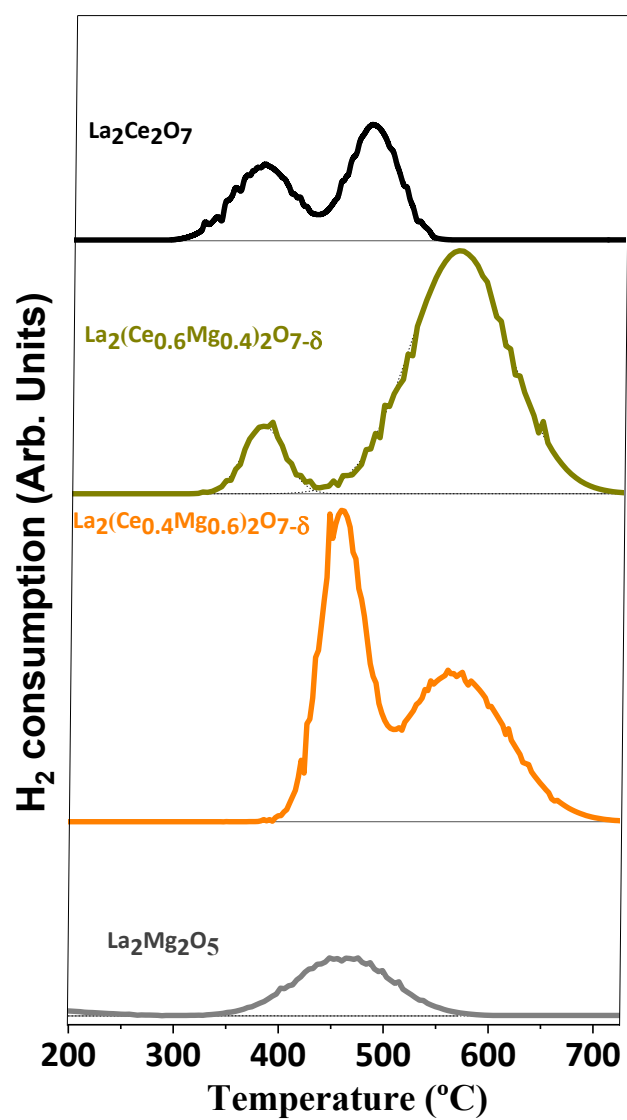

Figure 4S. TPR profiles of the La<sub>2</sub>(Ce<sub>1-x</sub>Mg<sub>x</sub>)<sub>2</sub>O<sub>7-δ</sub> catalysts.

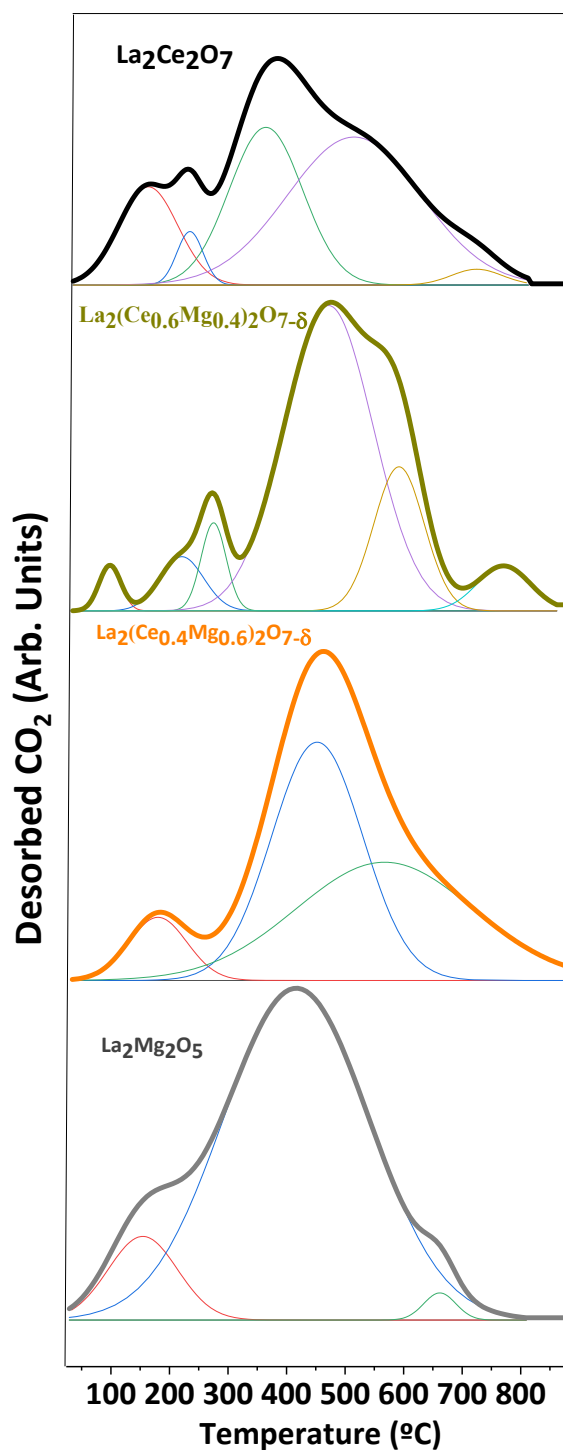

Figure 5S. CO<sub>2</sub>-TPD profiles of the La<sub>2</sub>(Ce<sub>1-x</sub>Mg<sub>x</sub>)<sub>2</sub>O<sub>7-δ</sub> catalysts.

Table 1S. Binding energies obtained by XPS for the surface elements of the La<sub>2</sub>(Ce<sub>1-x</sub>Mg<sub>x</sub>)<sub>2</sub>O<sub>7-δ</sub> catalysts. The integrated areas of the cerium peaks are shown in parentheses.

| Catalyst | Binding energy (eV) Ce <sup>3+</sup> | Binding energy (eV) Ce <sup>4+</sup> | Binding energy (eV) La <sup>3+</sup> | Binding energy (eV) O 1s | Binding energy (eV) C 1s | Binding energy (eV) Mg 2s |
|----------|--------------------------------------|--------------------------------------|--------------------------------------|--------------------------|--------------------------|---------------------------|
|          |                                      |                                      |                                      |                          |                          |                           |

|                                                                                      |                                                             |                                                                                              |                                                                      |                         |                                  |       |
|--------------------------------------------------------------------------------------|-------------------------------------------------------------|----------------------------------------------------------------------------------------------|----------------------------------------------------------------------|-------------------------|----------------------------------|-------|
| La <sub>2</sub> Ce <sub>2</sub> O <sub>7</sub>                                       | 881.6 (3594)<br>885.6 (2732)<br>896.7 (1040)<br>900.7 (982) | 882.5 (9001)<br>888.4 (6200)<br>897.9 (7989)<br>900.5 (6366)<br>906.5 (4445)<br>916.1 (6629) | 832.9<br>835.1<br>837.9<br>838.4<br>849.5<br>851.7<br>854.6<br>855.3 | 528.8<br>531.4<br>532.9 | 284.6<br>285.9<br>288.0<br>289.3 | ----- |
| La <sub>2</sub> (Ce <sub>0.6</sub> Mg <sub>0.4</sub> ) <sub>2</sub> O <sub>7-δ</sub> | 881.2 (6428)<br>885.2 (4286)<br>897.3 (590)<br>901.3 (393)  | 882.2 (4864)<br>888.2 (3242)<br>897.8 (6864)<br>900.7 (4184)<br>906.7 (2789)<br>916.1 (5349) | 833.7<br>835.2<br>837.7<br>839.2<br>850.3<br>852.1<br>854.3<br>855.7 | 528.9<br>531.5<br>533.1 | 284.7<br>286.1<br>288.2<br>289.8 | 88.9  |
| La <sub>2</sub> (Ce <sub>0.4</sub> Mg <sub>0.6</sub> ) <sub>2</sub> O <sub>7-δ</sub> | 881.6 (2385)<br>885.6 (1684)<br>897.5 (893)<br>901.5 (740)  | 882.5 (5141)<br>888.5 (3921)<br>897.8 (5764)<br>903.7 (5274)<br>908.7 (3483)<br>916.1 (3715) | 833.6<br>835.5<br>838.3<br>838.4<br>850.1<br>851.9<br>855.1<br>855.2 | 529.0<br>531.5<br>532.9 | 284.7<br>286.0<br>288.3<br>289.9 | 88.7  |
| La <sub>2</sub> Mg <sub>2</sub> O <sub>5</sub>                                       | -----                                                       | -----                                                                                        | 835.4<br>838.8<br>852.2<br>855.5                                     | 531.6<br>533.1          | 284.8<br>286.2<br>288.3<br>289.9 | 88.9  |

**Table 2S.** Analysis of the surface chemical compositions of the La<sub>2</sub>(Ce<sub>1-x</sub>Mg<sub>x</sub>)<sub>2</sub>O<sub>7-δ</sub> catalysts.

| Catalyst                                                                             | C (%) | O (%) | La (%) | Ce (%) | Mg (%) |
|--------------------------------------------------------------------------------------|-------|-------|--------|--------|--------|
| La <sub>2</sub> Ce <sub>2</sub> O <sub>7</sub>                                       | 63.3  | 32.5  | 2.7    | 1.5    | 0.0    |
| La <sub>2</sub> (Ce <sub>0.6</sub> Mg <sub>0.4</sub> ) <sub>2</sub> O <sub>7-δ</sub> | 52.4  | 34.7  | 3.0    | 1.1    | 8.8    |
| La <sub>2</sub> (Ce <sub>0.4</sub> Mg <sub>0.6</sub> ) <sub>2</sub> O <sub>7-δ</sub> | 55.0  | 32.3  | 2.5    | 0.9    | 9.2    |
| La <sub>2</sub> Mg <sub>2</sub> O <sub>5</sub>                                       | 57.4  | 28.8  | 1.8    | 0.0    | 12.0   |

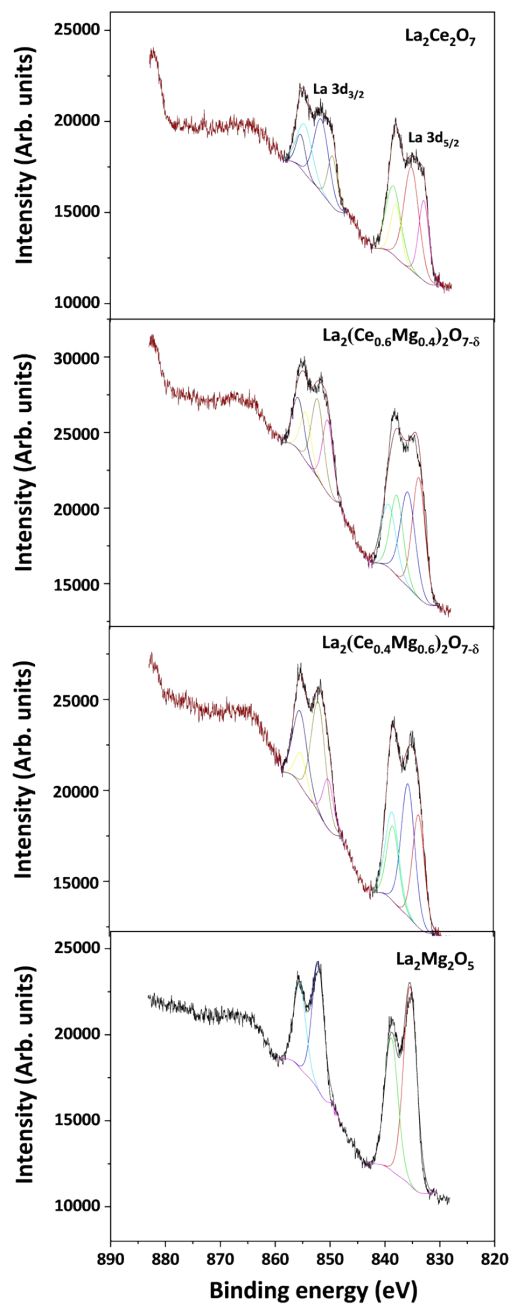

Figure 6S. La 3d spectra of the  $\text{La}_2(\text{Ce}_{1-x}\text{Mg}_x)_2\text{O}_{7-\delta}$  catalysts.

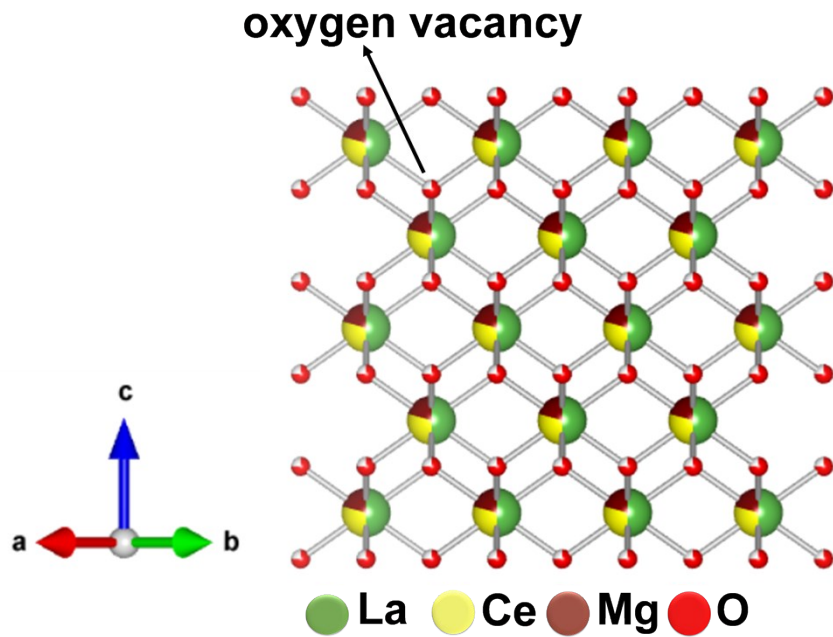

**Figure 7S.** Representation of the disordered defective cubic fluorite phase structure for the  $\text{La}_2(\text{Ce}_{0.6}\text{Mg}_{0.4})_2\text{O}_{7-\delta}$  catalyst.

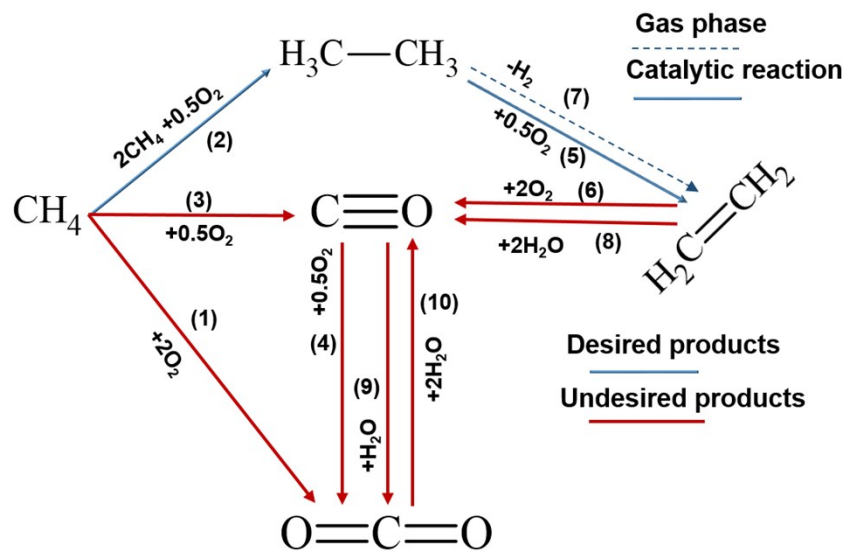

**Scheme 1S.** Major products and reaction pathways involved in the oxidative coupling of methane.

$$S_{CO_x} = \frac{\text{moles of CO or CO}_2 \text{ formed}}{\text{moles of methane reacted}} \times 100 \text{ (Eq. 2)}$$



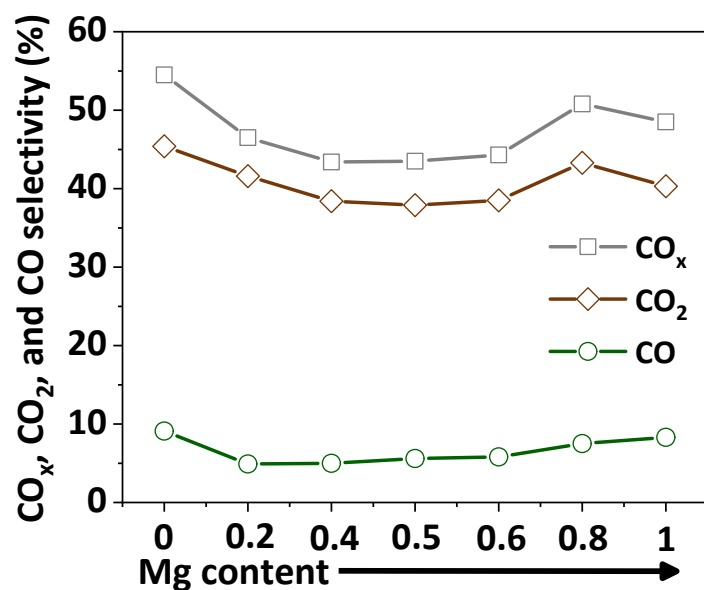

**Figure 8S.** CO<sub>x</sub> (CO<sub>2</sub> + CO), CO<sub>2</sub>, and CO selectivities in the OCM performed over the La<sub>2</sub>(Ce<sub>1-x</sub>Mg<sub>x</sub>)<sub>2</sub>O<sub>7-δ</sub> catalysts with different Mg contents. Reaction conditions: 200 mg catalyst, CH<sub>4</sub>:O<sub>2</sub>:N<sub>2</sub> = 4:1:4, WHSV = 18,000 mL.h<sup>-1</sup>.g<sub>cat</sub><sup>-1</sup>, 800 °C.

**Table 3S.** C<sub>2</sub> yields, O<sub>2</sub> conversions, and C<sub>2</sub>, C<sub>2</sub>H<sub>4</sub>, C<sub>2</sub>H<sub>6</sub>, CO<sub>2</sub>, and CO selectivities for the La<sub>2</sub>O<sub>3</sub>, MgO, and CeO<sub>2</sub> catalysts. Reaction conditions: 60 mL.min<sup>-1</sup> of CH<sub>4</sub>:O<sub>2</sub>:N<sub>2</sub> = 4:1:4, WHSV = 18,000 mL.h<sup>-1</sup>.g<sub>cat</sub><sup>-1</sup>, 800 °C.

| Catalyst                       | C <sub>2</sub> yield (%) | C <sub>2</sub> selectivity (%) | C <sub>2</sub> H <sub>4</sub> selectivity (%) | C <sub>2</sub> H <sub>6</sub> selectivity (%) | CO <sub>2</sub> selectivity (%) | CO selectivity (%) | O <sub>2</sub> conversion (%) |
|--------------------------------|--------------------------|--------------------------------|-----------------------------------------------|-----------------------------------------------|---------------------------------|--------------------|-------------------------------|
| La <sub>2</sub> O <sub>3</sub> | 7.8                      | 55.8                           | 32.5                                          | 23.3                                          | 36.1                            | 8.2                | 100                           |
| MgO                            | 7.0                      | 46.7                           | 30.3                                          | 16.4                                          | 27.6                            | 25.7               | 85                            |
| CeO <sub>2</sub>               | 0.9                      | 7.0                            | 3.8                                           | 3.2                                           | 72.7                            | 20.3               | 100                           |

**Table 4S.** Performances (conversions and C<sub>2</sub> selectivities or yields) and reaction conditions for catalysts reported in the literature for the OCM reaction.

| Catalyst                                                                                            | Reaction condition                                                                 | Conversion (%) | Selectivity (S) or yield (Y) for C <sub>2</sub> (%) | Ref. |
|-----------------------------------------------------------------------------------------------------|------------------------------------------------------------------------------------|----------------|-----------------------------------------------------|------|
| Mn <sub>x</sub> O <sub>y</sub> -Na <sub>2</sub> WO <sub>4</sub> /COK-12 (ordered mesoporous silica) | 775 °C, 100 mg catalyst, CH <sub>4</sub> /O <sub>2</sub> = 4                       | 24             | 60 (S)                                              | [1]  |
| Li/Sm <sub>2</sub> O <sub>3</sub> /MgO                                                              | 700 °C, 0.4 g catalyst, 2400 h <sup>-1</sup> , CH <sub>4</sub> /O <sub>2</sub> = 4 | 24             | 64 (S)                                              | [2]  |
| Sm <sub>2</sub> O <sub>3</sub> /MgO                                                                 | 700 °C, 0.4 g catalyst, 2400 h <sup>-1</sup> , CH <sub>4</sub> /O <sub>2</sub> = 4 | 22             | 52 (S)                                              | [2]  |
| Mn <sub>x</sub> O <sub>y</sub> -Na <sub>2</sub> WO <sub>4</sub> supported over SBA-15               | 750 °C, 50 mg catalyst, CH <sub>4</sub> /O <sub>2</sub> = 4                        | 14             | 70 (S)                                              | [3]  |
| Mn <sub>x</sub> O <sub>y</sub> -Na <sub>2</sub> WO <sub>4</sub> /La <sub>2</sub> O <sub>3</sub>     | 750 °C, 50 mg catalyst, CH <sub>4</sub> /O <sub>2</sub> = 4                        | 18             | 34 (S)                                              | [3]  |
| Mn <sub>x</sub> O <sub>y</sub> -Na <sub>2</sub> WO <sub>4</sub> /CaO                                | 750 °C, 50 mg catalyst, CH <sub>4</sub> /O <sub>2</sub> = 4                        | 18             | 26 (S)                                              | [3]  |

|                                                                                                 |                                                                                       |              |          |      |
|-------------------------------------------------------------------------------------------------|---------------------------------------------------------------------------------------|--------------|----------|------|
| Mn <sub>x</sub> O <sub>y</sub> -Na <sub>2</sub> WO <sub>4</sub> /SrO                            | 750 °C, 50 mg catalyst, CH <sub>4</sub> /O <sub>2</sub> = 4                           | 5.4          | 25 (S)   | [3]  |
| Mn <sub>x</sub> O <sub>y</sub> -Na <sub>2</sub> WO <sub>4</sub> /Al <sub>2</sub> O <sub>3</sub> | 750 °C, 50 mg catalyst, CH <sub>4</sub> /O <sub>2</sub> = 4                           | 13           | 25 (S)   | [3]  |
| Mn <sub>x</sub> O <sub>y</sub> -Na <sub>2</sub> WO <sub>4</sub> /ZrO <sub>2</sub>               | 750 °C, 50 mg catalyst, CH <sub>4</sub> /O <sub>2</sub> = 4                           | 10           | 21 (S)   | [3]  |
| Mn <sub>x</sub> O <sub>y</sub> -Na <sub>2</sub> WO <sub>4</sub> /Fe <sub>2</sub> O <sub>3</sub> | 750 °C, 50 mg catalyst, CH <sub>4</sub> /O <sub>2</sub> = 4                           | 2.3          | 73 (S)   | [3]  |
| Mn <sub>x</sub> O <sub>y</sub> -Na <sub>2</sub> WO <sub>4</sub> /Fe <sub>3</sub> O <sub>4</sub> | 750 °C, 50 mg catalyst, CH <sub>4</sub> /O <sub>2</sub> = 4                           | 1.6          | 63 (S)   | [3]  |
| Mn <sub>x</sub> O <sub>y</sub> -Na <sub>2</sub> WO <sub>4</sub> /TiO <sub>2</sub> -rutile       | 750 °C, 50 mg catalyst, CH <sub>4</sub> /O <sub>2</sub> = 4                           | 3.6          | 79 (S)   | [3]  |
| Mn <sub>x</sub> O <sub>y</sub> -Na <sub>2</sub> WO <sub>4</sub> /TiO <sub>2</sub> - anatase     | 750 °C, 50 mg catalyst, CH <sub>4</sub> /O <sub>2</sub> = 4                           | 1.6          | 63 (S)   | [3]  |
| Cs/Sr/MgO                                                                                       | 794 °C, 1 g catalyst, CH <sub>4</sub> /O <sub>2</sub> = 3                             | 33           | 59 (S)   | [4]  |
| Cs/Ba/MgO                                                                                       | 820 °C, 1 g catalyst, CH <sub>4</sub> /O <sub>2</sub> = 3                             | 32           | 57 (S)   | [4]  |
| 1 wt.% Li/MgO                                                                                   | 800 °C, 4500 h <sup>-1</sup> , CH <sub>4</sub> /O <sub>2</sub> = 2                    | 38           | 35 (S)   | [5]  |
| CaO/ZnO, Ca/Zn = 1.3                                                                            | 800 °C, 4500 h <sup>-1</sup> , CH <sub>4</sub> /O <sub>2</sub> = 2                    | 36           | 30 (S)   | [5]  |
| Na <sub>2</sub> WO <sub>4</sub> /Mn/SiO <sub>2</sub>                                            | 850 °C, 10,000 h <sup>-1</sup> , CH <sub>4</sub> /O <sub>2</sub> = 3.5                | 32           | 57 (S)   | [6]  |
| Na <sub>2</sub> WO <sub>4</sub> /Mn/SiO <sub>2</sub> modified with 16.7 wt.% MgO                | 850 °C, 10,000 h <sup>-1</sup> , CH <sub>4</sub> /O <sub>2</sub> = 2                  | 50           | 38 (S)   | [6]  |
| Na <sub>2</sub> WO <sub>4</sub> /Mn/SiO <sub>2</sub> modified with 40 wt.% TiO <sub>2</sub>     | 850 °C, 10,000 h <sup>-1</sup> , CH <sub>4</sub> /O <sub>2</sub> = 2                  | 39           | 59 (S)   | [6]  |
| 10% Na <sub>2</sub> WO <sub>4</sub> -5% Mn/SiO <sub>2</sub> , modified with 5% La               | 800 °C, 1 g of catalyst, 10% N <sub>2</sub> , CH <sub>4</sub> :O <sub>2</sub> = 32:8, | Not reported | 24 (Y)   | [7]  |
| 5 wt.% Ba/La <sub>2</sub> O <sub>3</sub>                                                        | 150 °C, 200 mg catalyst, 18 h <sup>-1</sup> , (in electric field, 3.0 mA, 600 V)      | 6.3          | 32.3 (S) | [8]  |
| Mn <sub>x</sub> O <sub>y</sub> -Na <sub>2</sub> WO <sub>4</sub> /SiC (porous)                   | 800 °C, 50 mg catalyst, CH <sub>4</sub> /O <sub>2</sub> = 4                           | 35           | 10 (S)   | [9]  |
| La <sub>2</sub> Ti <sub>2</sub> O <sub>7</sub>                                                  | 800 °C, 200 mg catalyst, CH <sub>4</sub> /O <sub>2</sub> = 4                          | ~18          | ~35 (S)  | [10] |
| La <sub>2</sub> Zr <sub>2</sub> O <sub>7</sub>                                                  | 800 °C, 200 mg catalyst, CH <sub>4</sub> /O <sub>2</sub> = 4                          | ~24          | ~55 (S)  | [10] |
| La <sub>2</sub> Ce <sub>2</sub> O <sub>7</sub>                                                  | 800 °C, 200 mg catalyst, CH <sub>4</sub> /O <sub>2</sub> = 4                          | ~29          | ~59 (S)  | [10] |
| LaInO <sub>3</sub>                                                                              | 800 °C, 0.7 h <sup>-1</sup> , CH <sub>4</sub> /O <sub>2</sub> = 5                     | 15           | 54 (S)   | [11] |
| La <sub>0.9</sub> Ba <sub>0.1</sub> InO <sub>3-δ</sub>                                          | 800 °C, 0.7 h <sup>-1</sup> , CH <sub>4</sub> /O <sub>2</sub> = 5                     | 22           | 59 (S)   | [11] |
| La <sub>0.6</sub> Ba <sub>0.4</sub> InO <sub>3-δ</sub>                                          | 800 °C, 0.7 h <sup>-1</sup> , CH <sub>4</sub> /O <sub>2</sub> = 5                     | 21           | 61 (S)   | [11] |

[1] COLMENARES, M. G., Simon, U., Yildiz, M., Arndt, S., Schomaecker, R., Thomas, A., Goerke, O. Oxidative coupling of methane on the Na<sub>2</sub>WO<sub>4</sub>-Mn<sub>x</sub>O<sub>y</sub> catalyst: COK-12 as an inexpensive alternative to SBA-15. *Catalysis Communications*, v. 85, p. 75-78, 2016.

[2] ELKINS, Trenton, W. Neumann, B., Bäumer, M., Hagelin-Weaver, H. E.. Effects of Li Doping on MgO-Supported Sm<sub>2</sub>O<sub>3</sub> and TbO<sub>x</sub> Catalysts in the Oxidative Coupling of Methane. *ACS Catalysis*, v. 4, n. 6, p. 1972-1990, 2014.

[3] YILDIZ, M. Y., Simon, U., Kailasam, K., Goerke, O., Rosowski, F., Arndt, S. Enhanced catalytic performance of Mn<sub>x</sub>O<sub>y</sub>-Na<sub>2</sub>WO<sub>4</sub>/SiO<sub>2</sub> for the oxidative coupling of methane using an ordered mesoporous silica support. *Chemical Communications*, v. 50, n. 92, p. 14440-14442, 2014.

[4] ASEEM, A. Jeba, G. G., Conato, M. T., Rimer, J. D., Harold, M. P. Oxidative coupling of methane over mixed metal oxide catalysts: Steady state multiplicity and catalyst durability. *Chemical Engineering Journal*, v. 331, p. 132-143, 2018.

[5] RAOUF, Fereshteh; TAGHIZADEH, Majid; YOUSEFI, Mohammad. Influence of CaO-ZnO supplementation as a secondary catalytic bed on the oxidative coupling of methane. *Reaction Kinetics, Mechanisms and Catalysis*, v. 112, n. 1, p. 227-240, 2014.

[6] LEE, Jong Yeol et al. Scaled-up production of C<sub>2</sub> hydrocarbons by the oxidative coupling of methane over pelletized Na<sub>2</sub>WO<sub>4</sub>/Mn/SiO<sub>2</sub> catalysts: Observing hot spots for the selective process. *Fuel*, v. 106, p. 851-857, 2013.

[7] GHOSE, Ranjita; HWANG, Hyun Tae; VARMA, Arvind. Oxidative coupling of methane using catalysts synthesized by solution combustion method: Catalyst optimization and kinetic studies. *Applied Catalysis A: General*, v. 472, p. 39-46, 2014.

[8] OSHIMA, Kazumasa, Tanaka, K., Yabe, T., Kikuchi, E., & Sekine, Y.. Oxidative coupling of methane using carbon dioxide in an electric field over La-ZrO<sub>2</sub> catalyst at low external temperature. *Fuel*, v. 107, p. 879-881, 2013.

[9] WANG, Huan, Schmack, R., Paul, B., Albrecht, M., Sokolov, S., Rümmler, S., Kraehnert, R.. Porous silicon carbide as a support for Mn/Na/W/SiC catalyst in the oxidative coupling of methane. *Applied Catalysis A: General*, v. 537, p. 33-39, 2017.

- [10] XU, Junwei Zhang, Y., Xu, X., Fang, X., Xi, R., Liu, Y., Wang, X. Constructing La<sub>2</sub>B<sub>2</sub>O<sub>7</sub> (B= Ti, Zr, Ce) compounds with three typical crystalline phases for the oxidative coupling of methane: the effect of phase structures, superoxide anions, and alkalinity on the reactivity. *ACS Catalysis*, v. 9, n. 5, p. 4030-4045, 2019.
- [11] OSHIMA, Kazumasa; SHINAGAWA, Tatsuya; SEKINE, Yasushi. Methane conversion assisted by plasma or electric field. *Journal of the Japan Petroleum Institute*, v. 56, n. 1, p. 11-21, 2013.

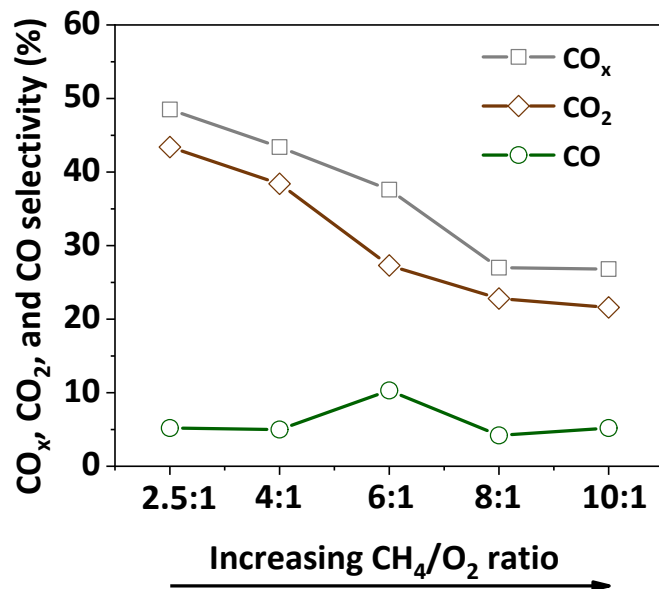

**Figure 9S.** CO<sub>x</sub> (CO<sub>2</sub>+CO), CO<sub>2</sub>, and CO selectivities in the OCM reaction performed over La<sub>2</sub>(Ce<sub>0.6</sub>Mg<sub>0.4</sub>)<sub>2</sub>O<sub>7-δ</sub>, varying the CH<sub>4</sub>/O<sub>2</sub> ratio. Reaction conditions: 200 mg catalyst, WHSV = 18,000 mL.h<sup>-1</sup>.g<sub>cat</sub><sup>-1</sup>, 800 °C.

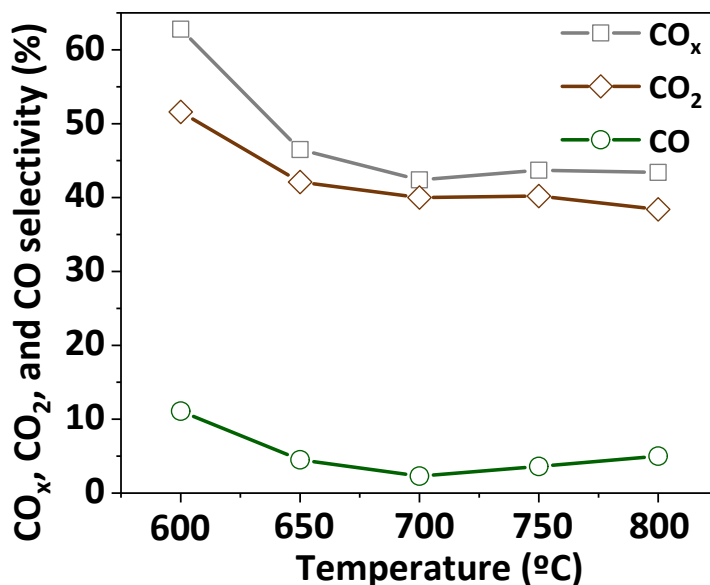

**Figure 10S.** CO<sub>x</sub> (CO<sub>2</sub>+CO), CO<sub>2</sub>, and CO selectivities in the OCM reaction performed over La<sub>2</sub>(Ce<sub>0.6</sub>Mg<sub>0.4</sub>)<sub>2</sub>O<sub>7-δ</sub>, varying the temperature. Reaction conditions: 200 mg catalyst, WHSV = 18,000 mL.h<sup>-1</sup>.g<sub>cat</sub><sup>-1</sup>.

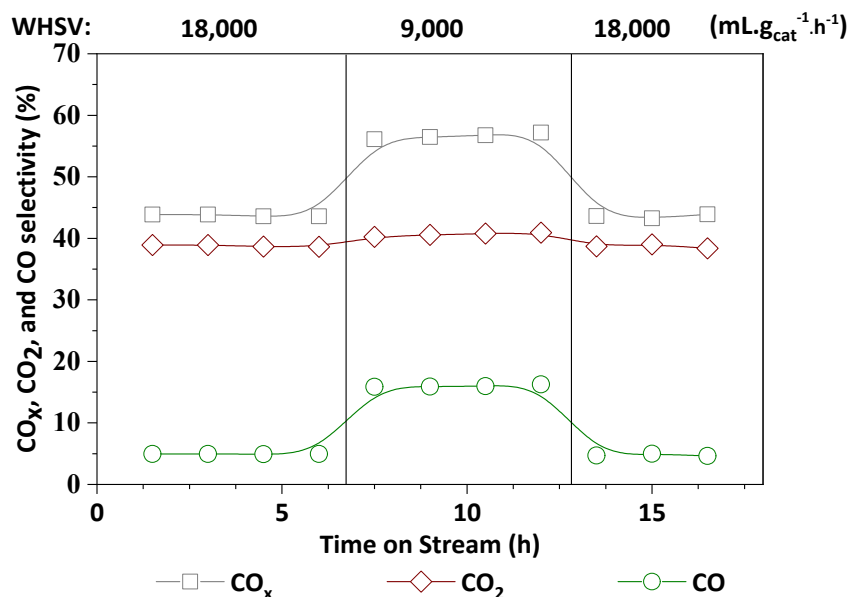

**Figure 11S.** CO<sub>x</sub> (CO<sub>2</sub>+CO), CO<sub>2</sub>, and CO selectivities in the OCM reaction performed over the La<sub>2</sub>(Ce<sub>0.6</sub>Mg<sub>0.4</sub>)<sub>2</sub>O<sub>7-δ</sub> catalyst (350 mg), varying the WHSV.

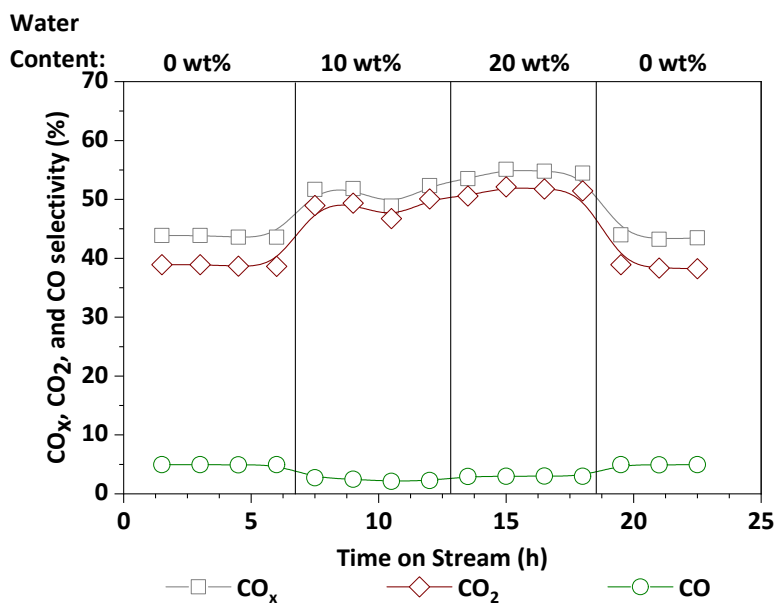

**Figure 12S.** CO<sub>x</sub> (CO<sub>2</sub>+CO), CO<sub>2</sub>, and CO selectivities in the OCM reaction performed over the La<sub>2</sub>(Ce<sub>0.6</sub>Mg<sub>0.4</sub>)<sub>2</sub>O<sub>7-δ</sub> catalyst, varying the amount of water in the feed of 0 wt.% (4 CH<sub>4</sub>: 1 O<sub>2</sub>: 4 N<sub>2</sub>), 10 wt.% (4 CH<sub>4</sub>: 1 O<sub>2</sub>: 4 N<sub>2</sub>: 1 H<sub>2</sub>O) and 20 wt.% (4 CH<sub>4</sub>: 1 O<sub>2</sub>: 4 N<sub>2</sub>: 2.25 H<sub>2</sub>O). Reaction conditions: 200 mg catalyst, 800 °C, WHSV = 18,000 mL.h<sup>-1</sup>.g<sub>cat</sub><sup>-1</sup>.
